# Supplementary material
Source: Springer Nature journal article supplement (http://www.springermedizin.de/resource/supplementary/12993_2012_447_MOESM1_ESM.pdf/9617804)

1

2

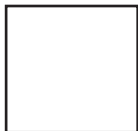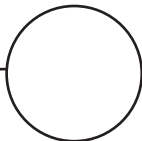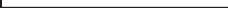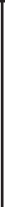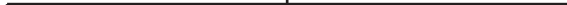

3

4

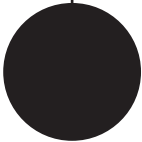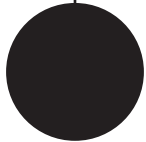

Supplement: MOESM1 [file 9617804]
